# Supplementary material
Source: publisher site journal article supplement (https://www.dovepress.com/get_supplementary_file.php?f=451338.docx)
Supplement: Supplementary file 1 [file get_supplementary_file.php]

**Supplementary Figures**


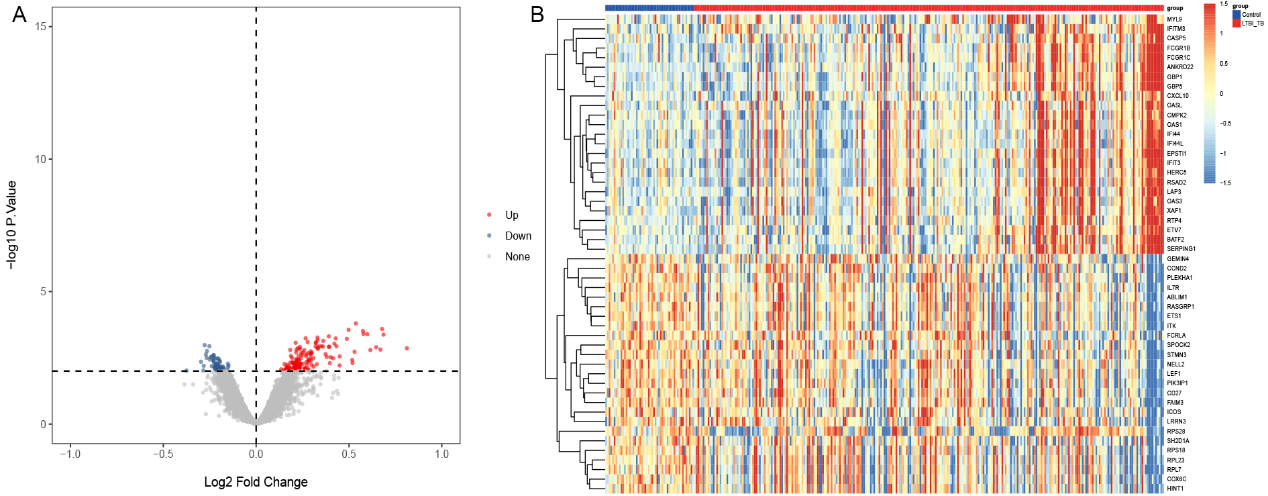


**Figure S1** The volcano plot (A) and heatmap (B) of DEGs.


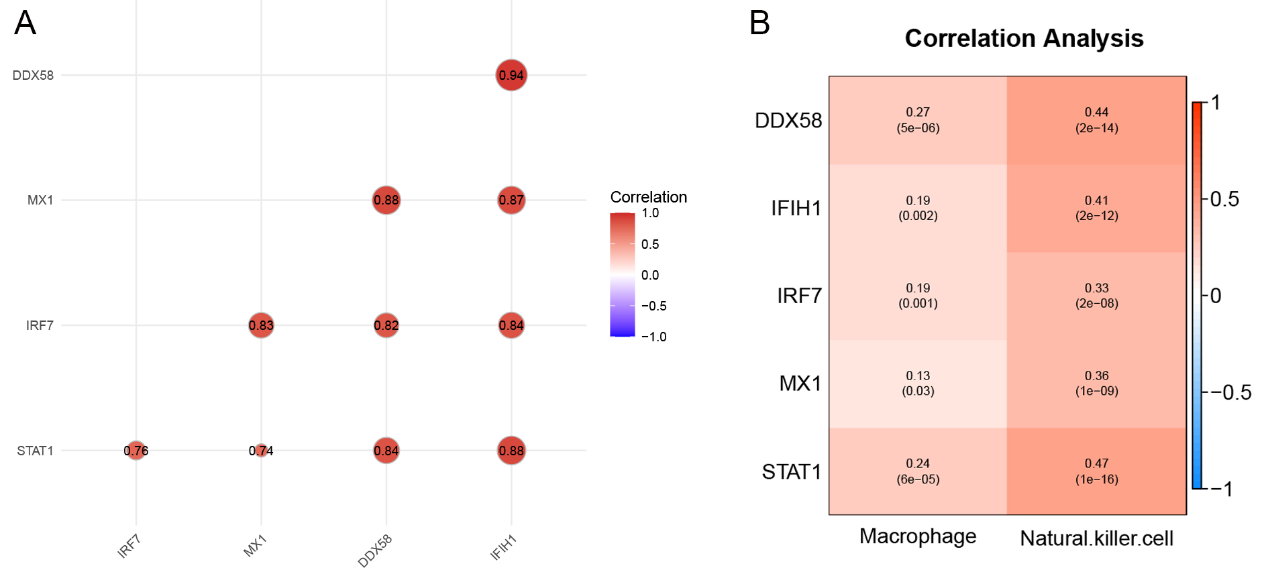


**Figure S2** Correlation analysis

(A) Correlation analysis of 5 real hub genes. (B) Correlation of 5 real hub genes and 2 immune cells.

**Supplementary Tables**

**Table S1** The characteristics of individuals in GEO datasets used in this study

|  | **ALL**  **(N = 355)** | **Control**  **(N = 75)** | **TB**  **(N = 110)** | **LTBI**  **(N = 245)** | ***p*-value** |
| --- | --- | --- | --- | --- | --- |
| **GSE42825 & GSE42826** | | | | | |
| Gender |  |  |  |  | 0.112 |
| Female | 57 (60.6%) | 49 (65.3%) | 8 (42.1%) | - |  |
| Male | 37 (39.4%) | 26 (34.7%) | 11 (57.9%) | - |  |
| **GSE79362** | | | | | |
| Age | 15.7 (1.5) | - | 15.6 (1.6) | 15.8 (1.4) | 0.278 |
| Gender |  |  |  |  | 0.077 |
| Female | 250 (70.4%) | - | 85 (77.3%) | 165 (67.3%) |  |
| Male | 105 (29.6%) | - | 25 (22.7%) | 80 (32.7%) |  |
| Previous diagnosis of TB |  |  |  |  | 0.220 |
| No | 306 (86.2%) | - | 99 (90.0%) | 207 (84.5%) |  |
| Yes | 49 (13.8%) | - | 11 (10.0%) | 38 (15.5%) |  |

TB, tuberculosis; LTBI, latent tuberculosis infection.
